# Supplementary material for: Host Response and Neo-Tissue Development during Resorption of a Fast Degrading Supramolecular Electrospun Arterial Scaffold
Source: PubMed Central journal article supplement (PMC6164451; doi:10.3390/bioengineering5030061), 2018-08-06
Supplement: bioengineering-05-00061-s001.pdf [file bioengineering-05-00061-s001.pdf]

**Table S1.** Genes analyzed by quantitative real-time polymerase chain reaction.

| <b>Primer</b>                                                                         | <b>Symbol</b>  | <b>Accession number</b> | <b>Primer sequence (5'-3')</b>                                 |
|---------------------------------------------------------------------------------------|----------------|-------------------------|----------------------------------------------------------------|
| Topoisomerase (DNA) I                                                                 | TOP1           | n/a                     | Primerdesign                                                   |
| $\beta$ -2 microglobulin                                                              | B2M            | n/a                     | Primerdesign                                                   |
| ATP synthase, H <sup>+</sup> transporting, mitochondrial F1 complex, beta polypeptide | ATP5B          | n/a                     | Primerdesign                                                   |
| Monocyte Chemotactic Protein-1                                                        | MCP-1          | NM_031530               | FW: CAGGTCTCTGTCACGCTTCT<br>RV: TGCTGCTGGTGATTCTCTTGT          |
| Transforming Growth Factor- $\beta$                                                   | TGF- $\beta$   | NM_021578.2             | FW: TCAGACATTCGGGAAGCAGT<br>RV: GACAGCCACTCAGGCGTATC           |
| Stromal cell-Derived Factor-1 $\alpha$                                                | SDF-1 $\alpha$ | NM_022177               | FW: GCTCTGCATCAGTGACGGT<br>RV: CTGGCGACATGGCTCTCAA             |
| Inducible Nitric Oxide Synthase                                                       | iNOS           | NM_012611.3             | FW:<br>CTTGGTGAGGGGACTGGACTTTTAG<br>RV: GCCATGTCTGTGACTTTGTGCT |
| Arginase 1                                                                            | Arg 1          | NM_017134.3             | FW: TGGTAGCAGAGACCCAGAAGA<br>RV: GAGCATCCACCCAAATGACG          |
| Mannose receptor                                                                      | MR             | NM_001106123            | FW: AAGCCTGTAGGAAGGAGGGT<br>RV: TCCCATCGCTCCACTCAAAG           |
| Interleukin 1 $\beta$                                                                 | IL-1 $\beta$   | NM_031512.2             | FW: GCAGGCTTCGAGATGAACAAC<br>RV: TTGTCGTTGCTTGTCTCTCCT         |
| Interleukin 4                                                                         | IL-4           | NM_201270               | FW: CACTTTGAACCAGGTCACAGA<br>RV: CTCGTTCTCCGTGGTGTTTC          |
| Interleukin 6                                                                         | IL-6           | NM_012589.2             | FW: TCTGGTCTTCTGGAGTTCCGT                                      |

|                      |               |                |                                                                     |
|----------------------|---------------|----------------|---------------------------------------------------------------------|
|                      |               |                | RV: GGAAGTTGGGGTAGGAAGGAC                                           |
| Interleukin 13       | IL-13         | NM_053828.1    | FW: GAGCAACATCACACAAGACCAG<br>RV: TGGAGATGTTGGTCAGGGATT             |
| Interferon- $\gamma$ | IFN- $\gamma$ | NM_138880      | FW:<br>ATGGATGCTATGGAAGGAAAGAG<br>RV:<br>AGAGTCTGAGGTAGAAAGAGATAATC |
| Collagen I           | Col I         | NM_053304.1    | FW: TGACGCATGGCCAAGAAGAC<br>RV: ATCAGGTTTCCACGTCTCACC               |
| Collagen III         | Col III       | NM_032085.1    | FW: TTCCTGGGAGAAATGGCGAC<br>RV: CCAGGATAGCCACCCATTCC                |
| Collagen IV          | Col IV        | NM_001135009.1 | FW: GGCAGAGGAACGTGCAATTAC<br>RV: GCGTGGGCTTCTTGAACATC               |
| Elastin              | Ela           | NM_012722.1    | FW: AGTTCCTGGTGTCTCGGTCTTC<br>RV: ACCTTGGCCTTGACTCCTGT              |
